# Supplementary material for: Subclinical Cardiovascular Disease Markers in Relation to Serum and Dietary Magnesium in Individuals from the General Population: The KORA-MRI Study
Source: MDPI journal article supplement (doi:10.3390/nu14234954), 2022-11-22
Supplement: s1 [file s1]

**Table S1:** Demographic and cardiovascular characteristics of excluded and included participants for the respective analyses.

|                          | Serum magnesium  |                  |         | Dietary magnesium |                  |         |
|--------------------------|------------------|------------------|---------|-------------------|------------------|---------|
|                          | excluded         | included         | P value | excluded          | included         | P value |
| <b>LVF</b>               | <b>(N = 36)</b>  | <b>(N = 363)</b> |         | <b>(N = 114)</b>  | <b>(N = 285)</b> |         |
| BMI (kg/m2)              | 30.00 (5.92)     | 27.95 (4.78)     | 0.017   | 28.98 (5.11)      | 27.79 (4.80)     | 0.029   |
| Waist circumference (cm) | 103.54(16.62)    | 98.12(14.01)     | 0.030   | 101.13(14.63)     | 97.60 (14.11)    | 0.026   |
| Hypertension             | 19 (52.8%)       | 117 (32.2%)      | 0.022   | .....             | .....            | .....   |
| Diabetes                 | 12 (33.3%)       | 42 (11.6%)       | 0.001   | 26 (22.8%)        | 28 (9.8%)        | 0.002   |
| Hypertensive medication  | 17 (47.2%)       | 85 (23.4%)       | 0.003   | .....             | .....            | .....   |
| Diabetic medication      | 7 (19.4%)        | 25 (6.9%)        | 0.020   | .....             | .....            | .....   |
| HbA1c (%)                | .....            | .....            | .....   | 5.73 (1.03)       | 5.52 (0.57)      | 0.008   |
| <b>RVF</b>               | <b>(N = 66)</b>  | <b>(N = 333)</b> |         | <b>(N = 138)</b>  | <b>(N = 261)</b> |         |
| Weight (Kg)              | .....            | .....            | .....   | 85.61 (16.52)     | 81.63 (16.45)    | 0.022   |
| BMI (kg/m2)              | .....            | .....            | .....   | 28.81 (4.89)      | 27.77 (4.90)     | 0.046   |
| Waist circumference (cm) | .....            | .....            | .....   | 101.06(14.00)     | 97.31 (14.36)    | 0.013   |
| Systolic BP (mmHg)       | .....            | .....            | .....   | 123.59(16.85)     | 119.12(16.49)    | 0.011   |
| Triglycerides (mg/dl)    | .....            | .....            | .....   | 145.95(95.44)     | 124.09(77.83)    | 0.014   |
| Diuretics med            | .....            | .....            | .....   | 11 (8.0%)         | 43 (16.5%)       | 0.027   |
| <b>Carotid plaque</b>    | <b>(N = 154)</b> | <b>(N = 245)</b> |         | <b>(N = 213)</b>  | <b>(N = 186)</b> |         |
| Male                     | 77 (50.0%)       | 153 (62.4)       | 0.019   | .....             | .....            | .....   |
| BMI (kg/m2)              | 29.06 (5.63)     | 27.55 (4.32)     | 0.003   | 28.70 (5.22)      | 27.48 (4.47)     | 0.013   |
| Waist circumference (cm) | .....            | .....            | .....   | 99.98 (14.96)     | 97.05 (13.45)    | 0.041   |
| Diabetes                 | 14 (9.1%)        | 40 (16.3%)       | <0.001  | 28 (13.1%)        | 26 (14.0%)       | 0.010   |
| Diabetic medication      | 6 (3.9%)         | 26 (10.6)        | 0.027   | .....             | .....            | .....   |
| Serum potassium (mmol/l) | 4.24 (0.26)      | 4.32 (0.29)      | 0.005   | .....             | .....            | .....   |

Only variables with significant differences (p<0.05) between included and excluded participants are presented. Values are reported as the mean (SD) or n (%), unless otherwise specified.  
BP, blood pressure; BMI, body mass index

**Table S2:** Demographic and cardiovascular risk factors by serum and dietary magnesium

|                             | All              | Low serum & dietary Mg | Low serum & high dietary Mg | High serum & low dietary Mg | High serum & dietary Mg | P value |
|-----------------------------|------------------|------------------------|-----------------------------|-----------------------------|-------------------------|---------|
|                             | N = 311 (77.9%)  | N = 75 (24.1%)         | N = 66 (21.2%)              | N = 79 (25.4%)              | N = 91 (29.3%)          |         |
| Age (years)                 | 56.39 (9.10)     | 57.08 (9.07)           | 57.52 (9.86)                | 54.71 (9.30)                | 56.47 (8.30)            | 0.247   |
| Male sex                    | 175 (56.3%)      | 56 (74.7%)             | 27 (40.9%)                  | 62 (78.5%)                  | 30 (33.0%)              | <0.001  |
| Weight (kg)                 | 82.23 (16.60)    | 85.65 (17.00)          | 80.31 (16.35)               | 85.93 (14.71)               | 77.60 (16.89)           | 0.002   |
| BMI (kg/m2)                 | 27.95 (4.97)     | 28.25 (5.04)           | 28.16 (5.31)                | 28.14 (4.27)                | 27.39 (5.25)            | 0.650   |
| Smoking                     |                  |                        |                             |                             |                         | 0.584   |
| Never smoker                | 115 (37.0%)      | 24 (32.0%)             | 31 (47.0%)                  | 28 (35.4%)                  | 32 (35.2%)              |         |
| Ex-smoker                   | 136 (43.7%)      | 37 (49.3%)             | 25 (37.9%)                  | 33 (41.8%)                  | 41 (45.1%)              |         |
| Smoker                      | 60 (19.3%)       | 14 (18.7%)             | 10 (15.2%)                  | 18 (22.8%)                  | 18 (19.8%)              |         |
| Waist circumference (cm)    | 97.99 (14.56)    | 101.29 (15.19)         | 96.51 (14.08)               | 100.44 (12.64)              | 94.22 (15.12)           | 0.005   |
| Systolic BP (mmHg)          | 120.05 (16.36)   | 124.89 (16.62)         | 119.49 (14.39)              | 121.46 (15.94)              | 115.23 (16.75)          | 0.002   |
| Diastolic BP (mmHg)         | 74.80 (9.90)     | 77.08 (10.59)          | 73.97 (8.86)                | 75.55 (9.35)                | 72.88 (10.20)           | 0.039   |
| Physically active           | 189 (60.8%)      | 44 (58.7%)             | 39 (59.1%)                  | 44 (55.7%)                  | 62 (68.1%)              | 0.371   |
| Hypertension                | 108 (34.7%)      | 33 (44.0%)             | 21 (31.8%)                  | 27 (34.2%)                  | 27 (29.7%)              | 0.615   |
| Glucose (mg/dl)             | 103.44 (18.28)   | 110.73 (25.44)         | 102.73 (15.70)              | 100.75 (14.11)              | 100.29 (14.39)          | 0.001   |
| HbA1c (%)                   | 5.53 (0.59)      | 5.70 (0.78)            | 5.53 (0.61)                 | 5.43 (0.41)                 | 5.50 (0.49)             | 0.034   |
| Diabetes                    |                  |                        |                             |                             |                         | 0.037   |
| No                          | 192 (61.7%)      | 42 (56.0%)             | 40 (60.6%)                  | 51 (64.6%)                  | 59 (64.8%)              |         |
| Prediabetes                 | 83 (26.7%)       | 17 (22.7%)             | 16 (24.2%)                  | 23 (29.1%)                  | 27 (29.7%)              |         |
| Diabetes                    | 36 (11.6%)       | 16 (21.3%)             | 10 (15.2%)                  | 5 (6.3%)                    | 5 (5.5%)                |         |
| Total cholesterol (mg/dl)   | 217.67 (36.18)   | 158.52 (117.74)        | 212.85 (32.56)              | 216.30 (38.57)              | 223.27 (36.29)          | 0.313   |
| HDL-C (mg/dl)               | 62.63 (17.82)    | 58.28 (17.40)          | 66.07 (16.46)               | 59.47 (16.48)               | 66.45 (19.13)           | 0.003   |
| LDL-C (mg/dl)               | 139.31 (33.50)   | 137.96 (33.09)         | 108.92 (52.99)              | 140.48 (35.23)              | 143.05 (33.79)          | 0.417   |
| Triglycerides (mg/dl)       | 127.65 (79.43)   | 142.52 (107.30)        | 132.14 (91.27)              | 130.44 (70.52)              | 113.35 (52.24)          | <0.001  |
| eGFR (ml/min/1.73 m2)       | 86.63 (13.10)    | 87.86 (14.04)          | 85.08 (13.01)               | 86.15 (12.68)               | 87.15 (12.79)           | 0.608   |
| Energy intake (kcal/day)    | 1841.53 (414.39) | 1949.80 (354.41)       | 1698.68 (374.16)            | 2056.87 (404.33)            | 1668.96 (387.11)        | <0.001  |
| Dietary calcium (mg/day)    | 763.29 (205.97)  | 724.21 (185.42)        | 803.69 (247.47)             | 753.60 (201.50)             | 774.60 (189.09)         | 0.127   |
| Dietary potassium (mg/day)  | 2532.28 (503.22) | 2462.53 (447.17)       | 2587.66 (560.32)            | 2565.46 (489.62)            | 2520.81 (515.67)        | 0.454   |
| Dietary phosphate (mg/day)  | 1111.75 (263.84) | 1094.27 (229.00)       | 1111.44 (297.10)            | 1165.73 (254.06)            | 1079.52 (270.37)        | 0.172   |
| Diabetic medication         | 23 (7.4%)        | 11 (14.7%)             | 8 (12.1%)                   | 2 (2.5%)                    | 2 (2.2%)                | 0.003   |
| Antihypertensive medication | 84 (27.0%)       | 24 (32.0%)             | 18 (27.3%)                  | 21 (26.6%)                  | 21 (23.1%)              | 0.643   |
| Lipid lowering medication   | 34 (10.9%)       | 14 (18.7%)             | 4 (6.1%)                    | 7 (8.9%)                    | 9 (9.9%)                | 0.083   |
| Diuretics medication        | 49 (15.8%)       | 9 (12.0%)              | 10 (15.2%)                  | 13 (16.5%)                  | 17 (18.7%)              | 0.698   |
| Anticoagulant medication    | 8 (2.6%)         | 3 (4.0%)               | 1 (1.5%)                    | 1 (1.3%)                    | 3 (3.3%)                | 0.652   |

Values are reported as the mean (SD) or n (%), unless otherwise specified. BP, blood pressure; BMI, body mass index; eGFR, estimated glomerular filtration rate

**Table S3:** Correlation between serum and dietary magnesium with cardiovascular risk factors and imaging markers of subclinical cardiovascular disease, assessed by Spearman correlation.

|                                     | Serum magnesium (mg/dl) |              | Dietary magnesium (mg/day) |                  |
|-------------------------------------|-------------------------|--------------|----------------------------|------------------|
|                                     | r coefficient           | p value      | r coefficient              | p value          |
| <b>Covariates</b>                   | <b>(N= 394)</b>         |              | <b>(N = 311)</b>           |                  |
| Age (years)                         | -0.082                  | 0.103        | -0.104                     | 0.068            |
| Weight (kg)                         | -0.024                  | 0.635        | 0.193                      | <b>&lt;0.001</b> |
| BMI (kg/m2)                         | -0.007                  | 0.893        | -0.074                     | 0.192            |
| Waist circumference (cm)            | -0.030                  | 0.547        | 0.069                      | 0.225            |
| Systolic BP (mmHg)                  | -0.149                  | <b>0.003</b> | 0.125                      | <b>0.028</b>     |
| Diastolic BP (mmHg)                 | -0.094                  | 0.061        | 0.095                      | 0.094            |
| Glucose (mg/dl)                     | -0.147                  | <b>0.003</b> | 0.003                      | 0.953            |
| HbA1c (%)                           | -0.053                  | 0.293        | -0.135                     | <b>0.017</b>     |
| Total cholesterol (mg/dl)           | 0.103                   | <b>0.04</b>  | -0.053                     | 0.354            |
| HDL-C (mg/dl)                       | -0.037                  | 0.465        | -0.033                     | 0.561            |
| LDL-C (mg/dl)                       | 0.131                   | <b>0.009</b> | -0.022                     | 0.701            |
| Triglycerides (mg/dl)               | 0.003                   | 0.952        | 0.013                      | 0.810            |
| eGFR (ml/min/1.73 m2)               | 0.013                   | 0.790        | 0.02                       | 0.730            |
| Serum potassium (mmol/l)            | -0.027                  | 0.596        | .....                      | .....            |
| Serum phosphate (mmol/l)            | 0.101                   | <b>0.045</b> | .....                      | .....            |
| Serum magnesium (mmol/l)            | 1                       | 0.000        | 0.038                      | 0.501            |
| Energy intake (kcal/day)            | .....                   | .....        | 0.845                      | <b>&lt;0.001</b> |
| Dietary calcium (mg/day)            | .....                   | .....        | 0.580                      | <b>&lt;0.001</b> |
| Dietary potassium (mg/day)          | .....                   | .....        | 0.899                      | <b>&lt;0.001</b> |
| Dietary phosphate (mg/day)          | .....                   | .....        | 0.914                      | <b>&lt;0.001</b> |
| <b>Left ventricular function</b>    | <b>(N = 366)</b>        |              | <b>(N = 287)</b>           |                  |
| Early diastolic filling rate (ml/s) | 0.028                   | 0.598        | 0.113                      | 0.055            |
| Late diastolic filling rate (ml/s)  | 0.017                   | 0.746        | 0.088                      | 0.136            |
| End diastolic volume (ml/m2)        | -0.030                  | 0.564        | 0.192                      | <b>0.001</b>     |
| End systolic volume (ml/m2)         | -0.009                  | 0.860        | 0.205                      | <b>&lt;0.001</b> |
| Stroke volume (ml/m2)               | -0.015                  | 0.775        | 0.133                      | 0.024            |
| Cardiac output (ml/min/m2)          | -0.068                  | 0.195        | 0.172                      | 0.003            |
| Ejection fraction (%)               | -0.018                  | 0.727        | -0.137                     | <b>0.021</b>     |
| Peak ejection rate (ml/s)           | -0.022                  | 0.696        | -0.166                     | <b>0.005</b>     |
| Myocardial mass (g/m2)              | -0.058                  | 0.267        | 0.224                      | <b>&lt;0.001</b> |
| Remodeling index (g/ml/m2)          | 0.008                   | 0.877        | -0.185                     | <b>0.002</b>     |
| Mean diastolic thickness (mm/m2)    | -0.068                  | 0.195        | -0.120                     | <b>0.042</b>     |
| <b>Right ventricular function</b>   | <b>(N = 334)</b>        |              | <b>(N = 263)</b>           |                  |
| End diastolic volume (ml/m2)        | -0.089                  | 0.103        | 0.256                      | <b>&lt;0.001</b> |
| End systolic volume (ml/m2)         | -0.134                  | 0.014        | 0.327                      | <b>&lt;0.001</b> |
| Stroke volume (ml/m2)               | -0.008                  | 0.878        | 0.098                      | 0.112            |
| Cardiac output (ml/min/m2)          | -0.072                  | 0.187        | 0.168                      | <b>0.006</b>     |
| Ejection fraction (%)               | 0.122                   | 0.025        | -0.285                     | <b>&lt;0.001</b> |
| <b>Carotid plaque</b>               | <b>(N = 248)</b>        |              | <b>(N = 188)</b>           |                  |
| Wall thickness left (mm)            | -0.044                  | 0.488        | 0.001                      | 0.994            |
| Wall thickness right (mm)           | -0.132                  | <b>0.037</b> | -0.046                     | 0.530            |

**Table S4:** Imaging markers of subclinical cardiovascular disease by serum and dietary magnesium

|                                     | All                    | Low serum & dietary Mg | Low serum & high dietary Mg | High serum & low dietary Mg | High serum & dietary Mg | P value      |
|-------------------------------------|------------------------|------------------------|-----------------------------|-----------------------------|-------------------------|--------------|
| <b>Left ventricular function</b>    | <b>N = 287 (91.7%)</b> | <b>N = 71 (24.7%)</b>  | <b>N = 61 (21.3%)</b>       | <b>N = 70 (24.4%)</b>       | <b>N = 85 (29.6%)</b>   |              |
| Early diastolic filling rate (ml/s) | 229.48 (115.39)        | 233.10 (117.45)        | 217.20 (107.66)             | 220.80 (103.04)             | 242.40 (128.39)         | 0.529        |
| Late diastolic filling rate (ml/s)  | 227.74 (110.88)        | 229.09 (125.44)        | 219.41 (104.52)             | 224.82 (112.71)             | 234.99 (101.95)         | 0.859        |
| End diastolic volume (ml/m2)        | 66.65 (14.81)          | 66.42 (16.49)          | 66.42 (16.49)               | 64.36 (13.00)               | 68.18 (14.31)           | 0.437        |
| End systolic volume (ml/m2)         | 20.73 (8.08)           | 20.95 (8.62)           | 20.76 (8.55)                | 20.00 (6.93)                | 21.12 (8.26)            | 0.845        |
| Stroke volume (ml/m2)               | 45.94 (9.43)           | 46.36 (9.74)           | 45.66 (10.62)               | 44.39 (8.51)                | 47.05 (8.94)            | 0.352        |
| Cardiac output (ml/min/m2)          | 3041.45 (574.70)       | 3116.56 (609.98)       | 3046.41 (657.54)            | 2977.80 (501.93)            | 3027.58 (538.81)        | 0.549        |
| Ejection fraction (%)               | 69.53 (7.27)           | 69.61 (7.38)           | 69.46 (7.97)                | 69.31 (6.50)                | 69.69 (7.38)            | 0.990        |
| Peak ejection rate (ml/s)           | 356.40 (133.62)        | 368.23 (151.20)        | 331.74 (117.99)             | 354.20 (121.53)             | 366.04 (137.87)         | 0.379        |
| Myocardial mass (g/m2)              | 70.71 (12.72)          | 74.96 (12.40)          | 67.75 (12.51)               | 72.16 (12.67)               | 68.08 (12.20)           | <b>0.001</b> |
| LGE                                 | 9 (3.1%)               | 2 (2.8%)               | 1 (1.6%)                    | 1 (1.4%)                    | 5 (5.9%)                | 0.354        |
| Remodeling index (g/ml/m2)          | 0.57 (0.14)            | 0.59 (0.15)            | 0.56 (0.16)                 | 0.58 (0.15)                 | 0.55 (0.11)             | 0.363        |
| Mean diastolic thickness (mm/m2)    | 4.81 (0.63)            | 4.94 (0.69)            | 4.74 (0.64)                 | 4.81 (0.60)                 | 4.76 (0.58)             | 0.216        |
| <b>Right ventricular function</b>   | <b>N = 263 (84%)</b>   | <b>N = 65 (24.7%)</b>  | <b>N = 52 (19.8%)</b>       | <b>N = 63 (23.9%)</b>       | <b>N = 83 (31.6%)</b>   |              |
| End diastolic volume (ml/m2)        | 85.66 (17.65)          | 88.17 (18.09)          | 86.85 (19.94)               | 83.59 (16.21)               | 84.51 (16.85)           | 0.431        |
| End systolic volume (ml/m2)         | 40.52 (12.03)          | 43.07 (12.45)          | 41.12 (12.15)               | 39.59 (11.21)               | 38.84 (12.06)           | 0.169        |
| Stroke volume (ml/m2)               | 45.18 (9.00)           | 45.16 (8.82)           | 45.74 (10.55)               | 43.99 (8.49)                | 45.74 (8.52)            | 0.653        |
| Cardiac output (ml/min/m2)          | 1561.98(1314.1)        | 3043.38 (608.65)       | 3022.10 (675.59)            | 2956.78 (508.55)            | 2905.67 (524.66)        | 0.470        |
| Ejection fraction (%)               | 53.21 (6.89)           | 51.71 (6.71)           | 53.08 (6.41)                | 53.05 (6.94)                | 54.59 (7.14)            | 0.090        |
| <b>Carotid plaque</b>               | <b>N = 188 (60.1%)</b> | <b>N = 57 (30.3%)</b>  | <b>N= 40 (21.3%)</b>        | <b>N = 43 (22.9)</b>        | <b>N = 48 (25.5%)</b>   |              |
| Presence of plaque                  | 41 (21.8%)             | 11 (19.3%)             | 6 (15.0%)                   | 12 (27.9%)                  | 12 (25.0%)              | 0.471        |
| Presence of plaque type             |                        |                        |                             |                             |                         | 0.135        |
| AHA type I                          | 147 (78.2%)            | 46 (80.7%)             | 34 (85.0%)                  | 31 (72.1%)                  | 36 (75.0%)              |              |
| AHA type III                        | 28 (14.9%)             | 7 (12.3%)              | 5 (12.5%)                   | 8 (18.6%)                   | 8 (16.7%)               |              |
| AHA type V                          | 7 (3.7%)               | 2 (3.5%)               | 1 (2.5%)                    | 4 (9.3%)                    | 0 (0.0%)                |              |
| AHA type VI or VII                  | 6 (3.2%)               | 2 (3.5%)               | 0 (0.0%)                    | 0 (0.0%)                    | 4 (8.3%)                |              |
| Wall thickness left (mm)            | 0.75 (0.11)            | 0.77 (0.13)            | 0.75 (0.09)                 | 0.74 (0.09)                 | 0.74 (0.11)             | 0.444        |
| Wall thickness right (mm)           | 0.76 (0.10)            | 0.79 (0.11)            | 0.76 (0.10)                 | 0.73 (0.08)                 | 0.73 (0.11)             | <b>0.016</b> |

Values are reported as the mean (SD), n (%), unless otherwise indicated
